# Supplementary material for: Shear-induced alignment of low-aspect-ratio nanorods for modulations of multiple optical properties
Source: Royal Society of Chemistry journal article supplement (doi:10.1039/d2tc01896a), 2022-01-01
Supplement: d2tc01896a1.pdf [file d2tc01896a1.pdf]

## Supporting Information

### Shear-induced alignment of low-aspect-ratio nanorods for modulations of multiple optical properties

Zhijie Chen,<sup>a</sup> Hai Li,<sup>a</sup> Chaoran Li,<sup>\*a</sup> Jingjing Liu,<sup>b</sup> Wenqiang Hua,<sup>c</sup> Xiaojie Zhang,<sup>d</sup> Chengcheng Zhang,<sup>a</sup> Mengqi Xiao,<sup>a</sup> Ao-Bo Xu,<sup>a</sup> Le He,<sup>\*a</sup> and Xiaohong Zhang<sup>\*a</sup>

<sup>a</sup>Institute of Functional Nano & Soft Materials (FUNSOM), Jiangsu Key Laboratory for Carbon-Based Functional Materials & Devices, Soochow University, 199 Ren'ai Road, Suzhou, 215123, Jiangsu, PR China.

E-mail: lehe@suda.edu.cn; crli@suda.edu.cn; xiaohong\_zhang@suda.edu.cn

<sup>b</sup>Institute of Information Technology, Suzhou Institute of Trade and Commerce, Suzhou, 215009, Jiangsu, PR China.

<sup>c</sup>Shanghai Synchrotron Radiation Facility, Shanghai Advanced Research Institute, Chinese Academy of Sciences, Shanghai 201204, PR China

<sup>d</sup>Department of Experimental Center, Medical College, Soochow University, Suzhou, 215123, Jiangsu, PR China

# Supporting Information

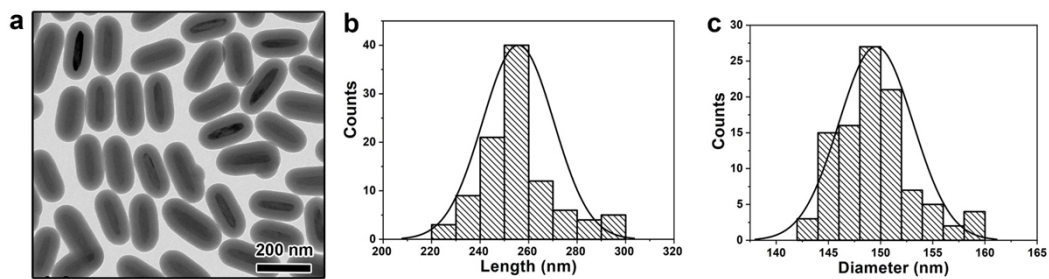

**Fig. S1** (a) TEM image of silica nanorods prepared from the FeOOH template. (b-c)

Average length and diameter obtained by measuring 100 particles.

## Supporting Information

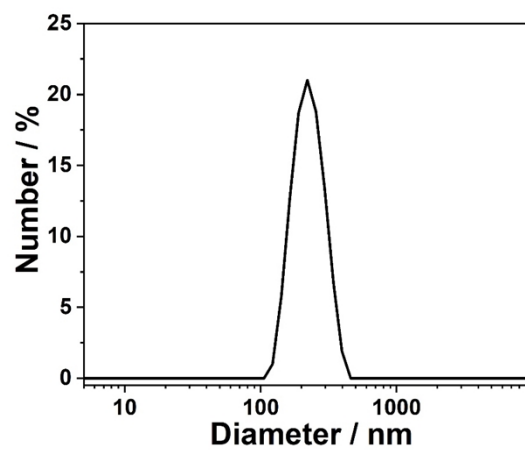

**Fig. S2** DLS curve of the nanorod building blocks.

## Supporting Information

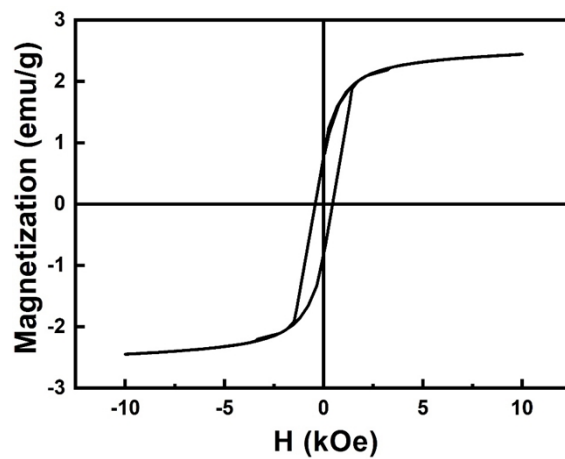

**Fig. S3** The room-temperature magnetization curve of the  $\text{Fe}_3\text{O}_4@\text{SiO}_2$  nanorods revealed their ferromagnetic nature, with a saturated magnetization of 2.43 emu/g, a remanence of 0.82 emu/g, and a coercivity of 0.45 kOe.

## Supporting Information

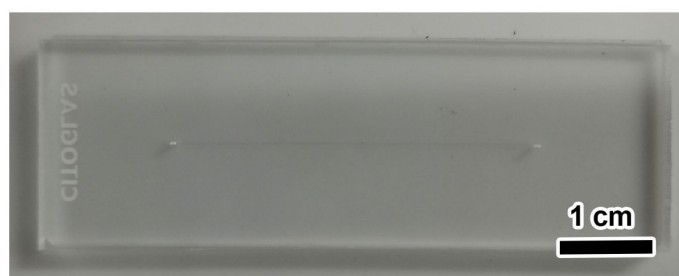

**Fig. S4** Digital image of the microfluidic chip used in the experiment.

## Supporting Information

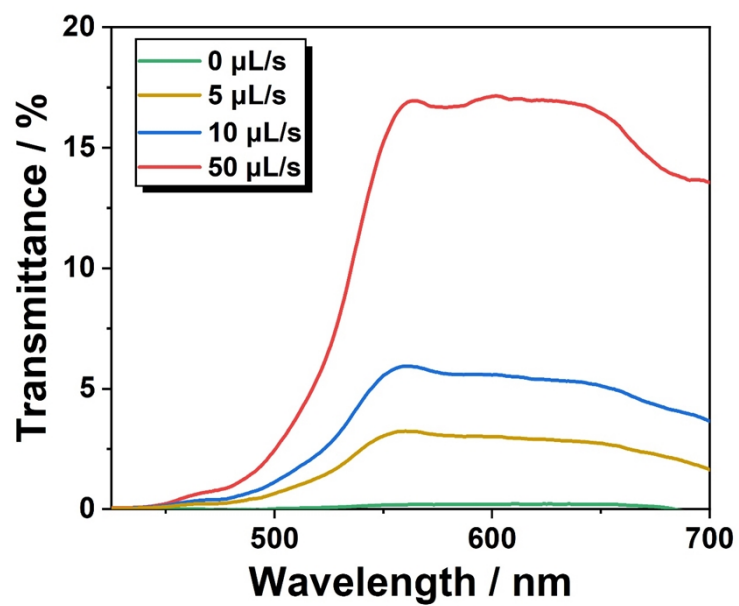

**Fig. S5** The transmitted spectrum of the nanorod CCA (volume fraction = 30%) flowing through the microfluidic chip with different rates.

## Supporting Information

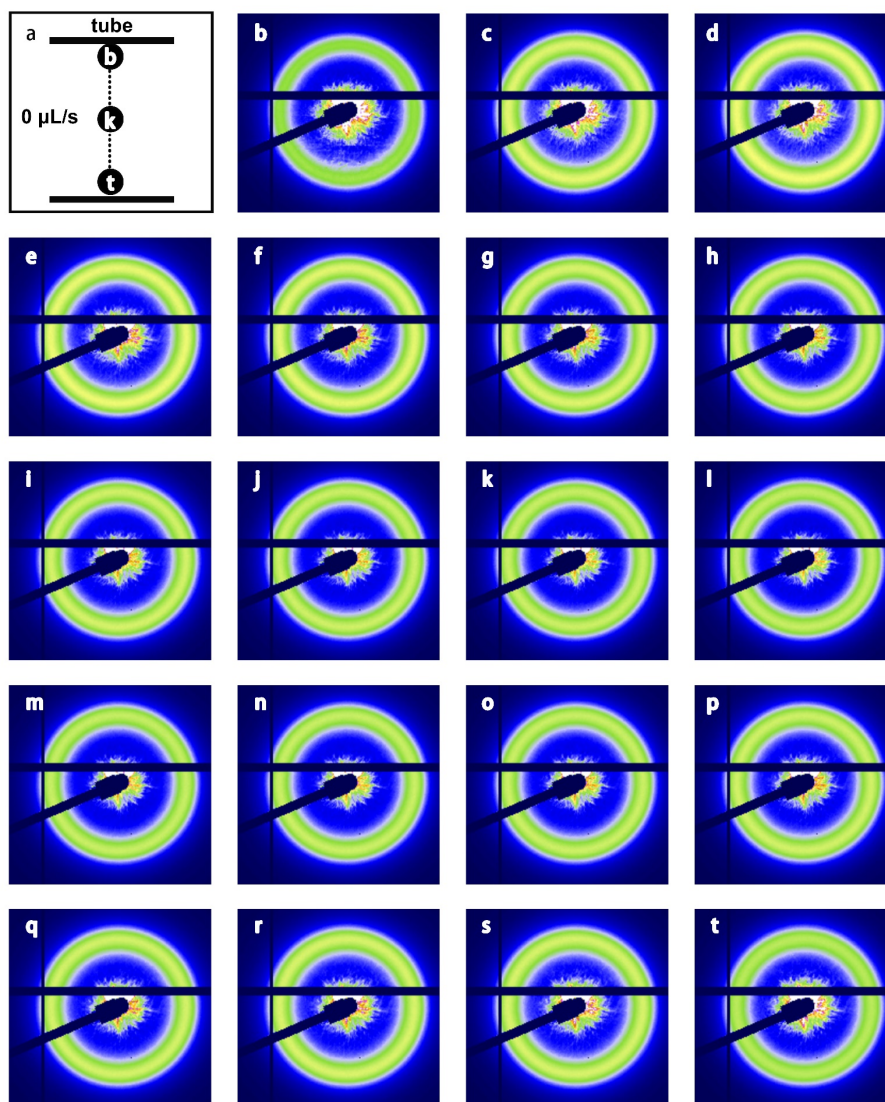

**Fig. S6** (a) Schematic illustration of the side view of the tube. The black dots indicate different measured positions. (b-t) USAXS patterns of the nanorod CCA (volume fraction = 30%) in the stationary state measured from different positions.

## Supporting Information

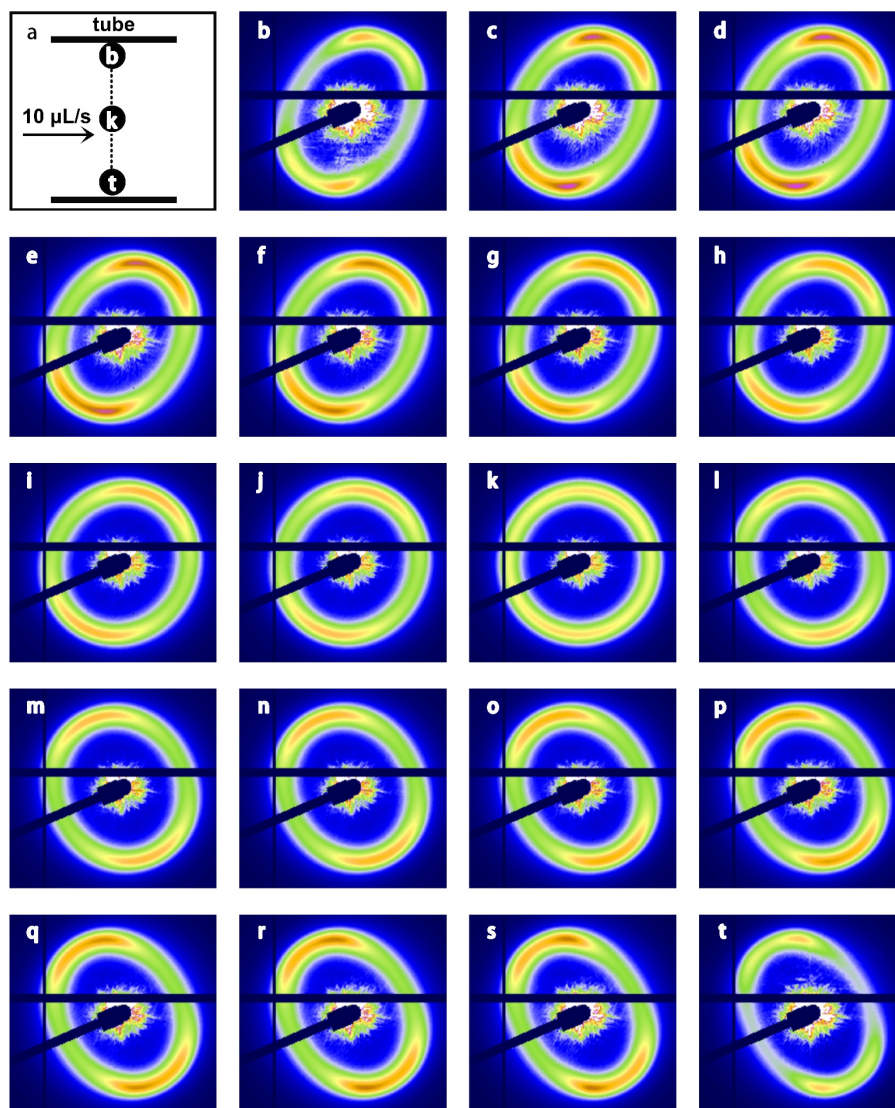

**Fig. S7** USAXS patterns of the nanorod CCA (volume fraction = 30%) at the flow rate of  $10 \mu\text{L/s}$  measured from different positions.





## Supporting Information

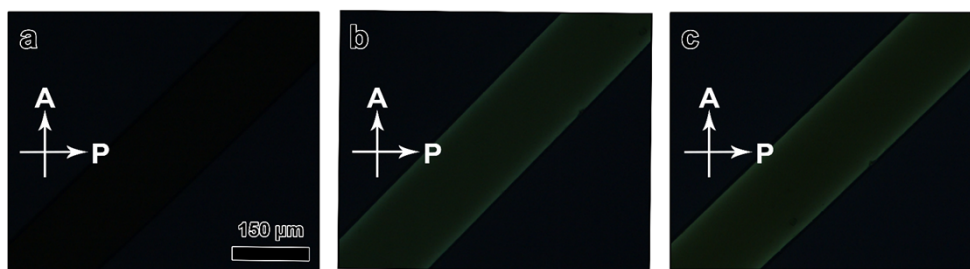

**Fig. S9** POM images of the silica nanorod suspension with the 5% volume fraction flowing through a microfluidic chip with different rates: (a) 0  $\mu\text{L/s}$ , (b) 10  $\mu\text{L/s}$  and (c) 40  $\mu\text{L/s}$ .

## Supporting Information

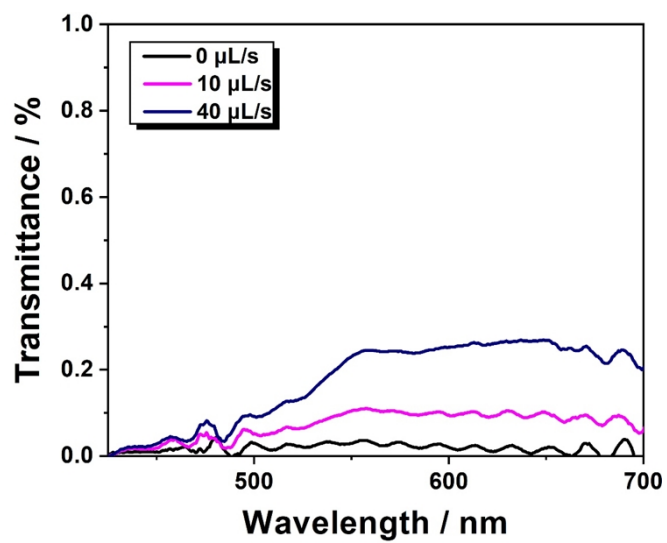

**Fig. S10** Transmittance spectra of the silica nanorod suspension (volume fraction = 5%) flowing through the microfluidic channel at different rates.

## Supporting Information

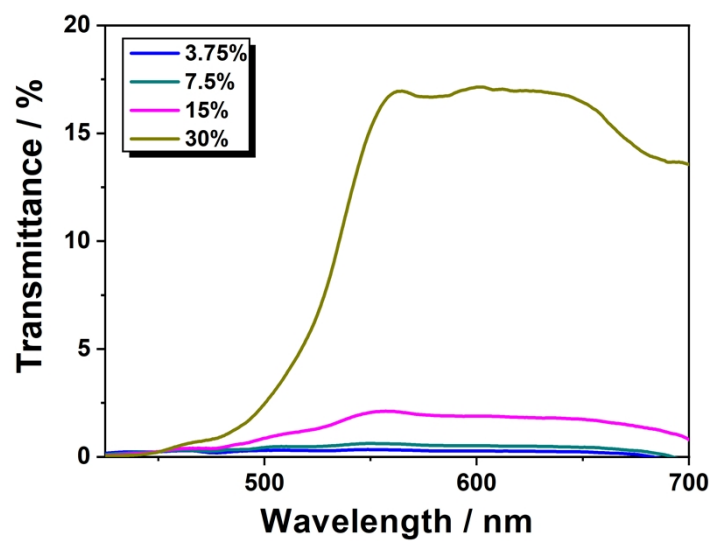

**Fig. S11** Transmittance spectra of different silica nanorod suspensions flowing through the microfluidic channel at the rate of 50  $\mu\text{L/s}$ .

## Supporting Information

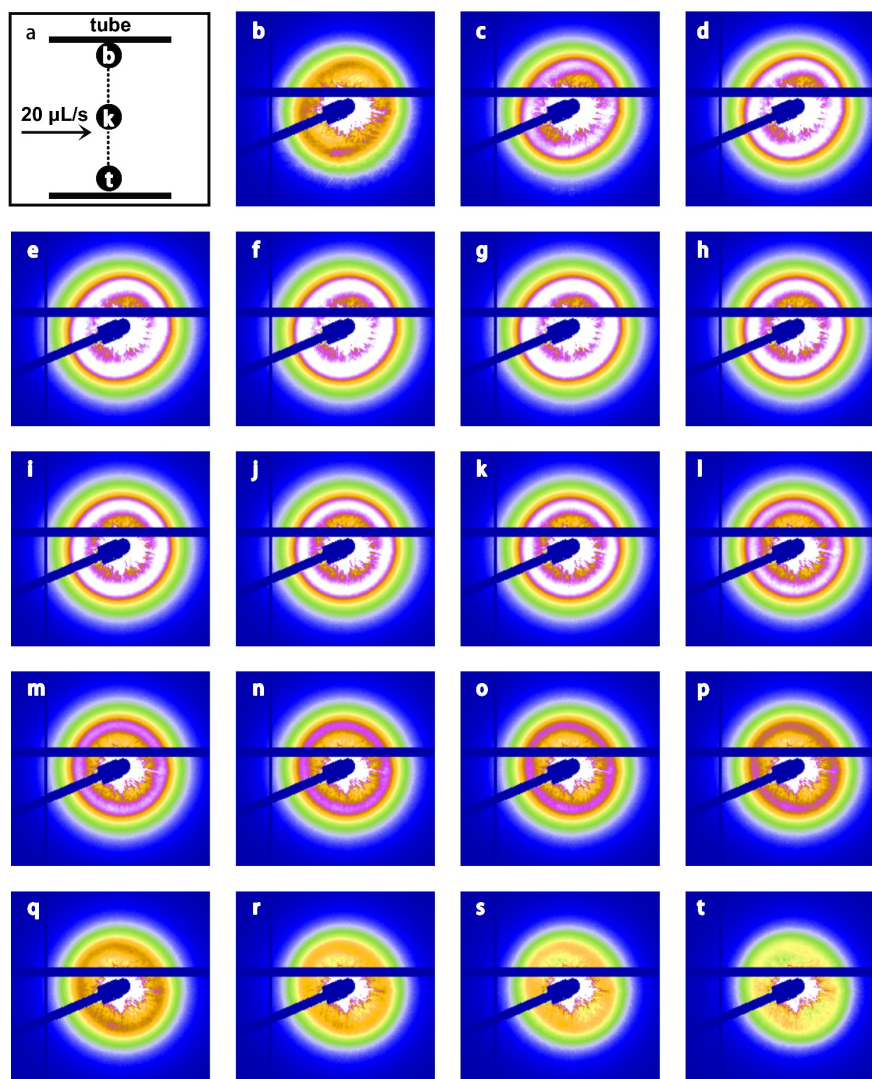

**Fig. S12** USAXS patterns of the silica nanorod suspension (volume fraction = 5%) at a 20  $\mu\text{L/s}$  flow rate measured from different positions.

## Supporting Information

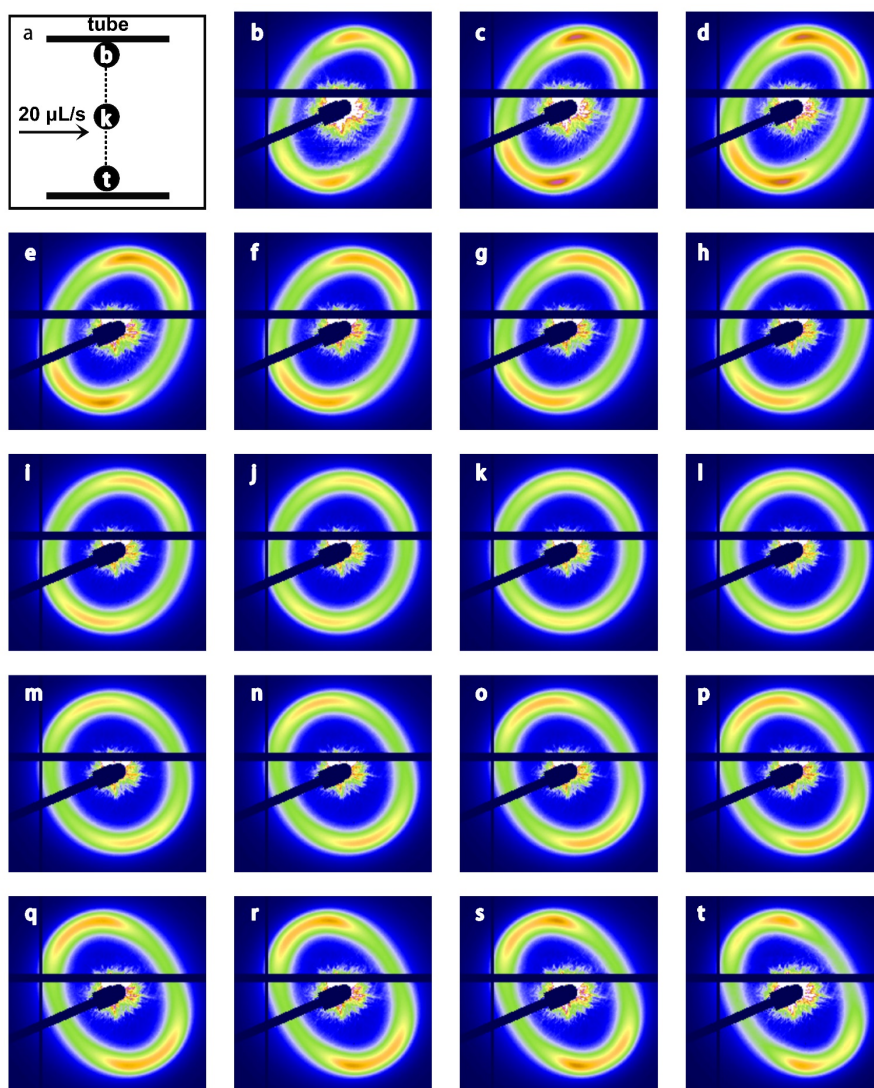

**Fig. S13** USAXS patterns of the nanorod CCA (volume fraction = 30%) at a 20  $\mu\text{L/s}$  flow rate measured from different positions.

## Supporting Information

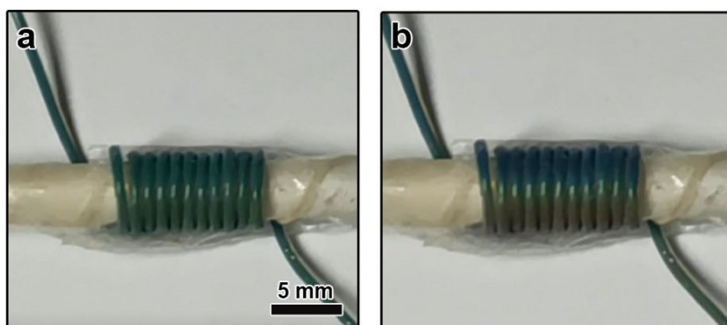

**Fig. S14** Digital photos of the structural color of the nanorod suspension (volume fraction = 20%) (a) in the stationary state and (b) with a 10  $\mu\text{L/s}$  flow rate.

## Supporting Information

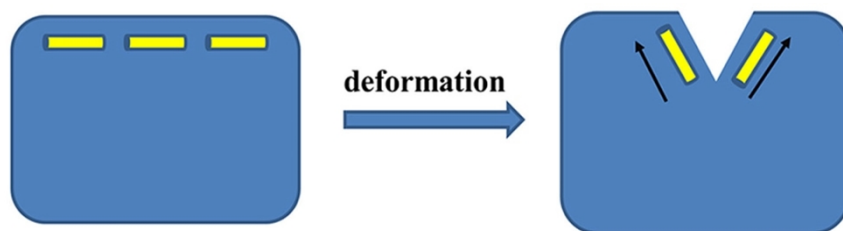

**Fig. S15** Schematic diagram of the moving process of the nanorods in the film caused by the liquid flow generated from the deformation.



## Supporting Information

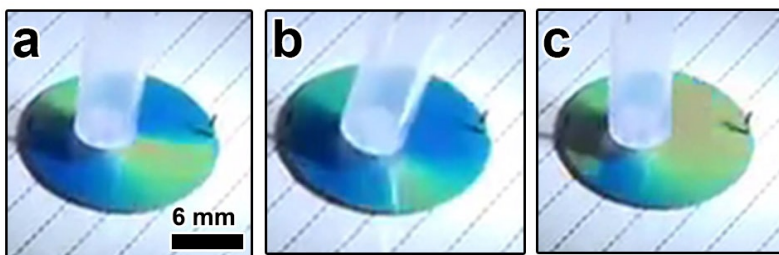

**Fig. S16** Digital photos of different patterns caused by pressing down on the device constructed with the nanorod CCA (volume fraction = 20%).

## Supporting Information

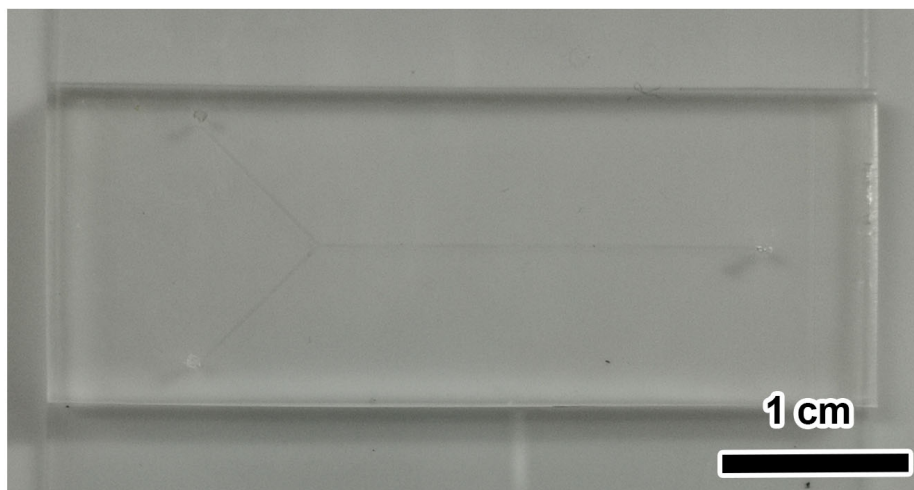

**Fig. S17** Digital photo of the microfluidic chip used in the experiment. The suspension was flowing from the right entrance to the left branched exit. The exit was blocked or circulated.

## Supporting Information

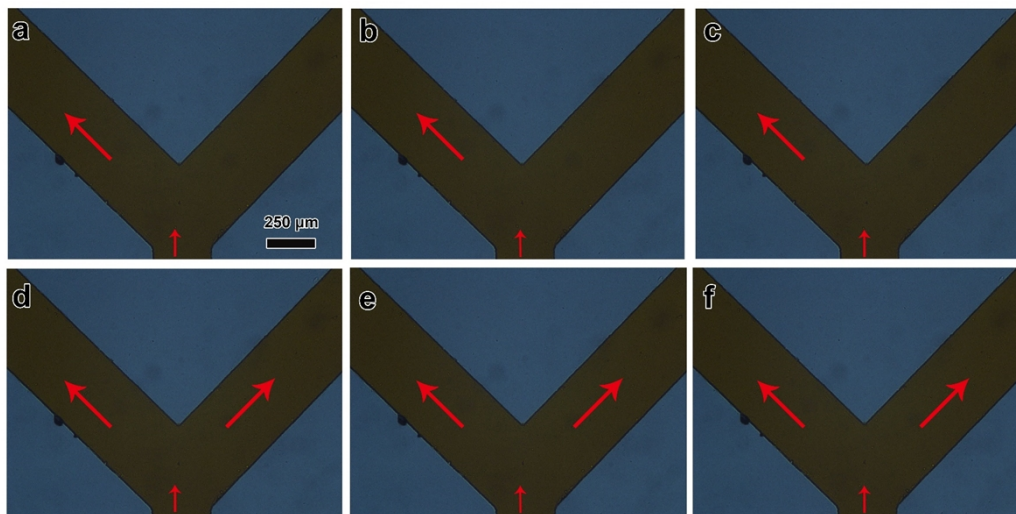

**Fig. S18** Optical microscopy images of the nanorod CCA (volume fraction = 20%) encapsulated inside a Y-shaped microfluidic channel at different flow rates: 0  $\mu\text{L/s}$  for (a) and (d), 10  $\mu\text{L/s}$  for (b) and (e), 30  $\mu\text{L/s}$  for (c) and (f). The right exit of the channel was intentionally blocked in (a-c).

# Supporting Information

## Supplementary Video

**Video S1** Video of the nanorod CCA (volume fraction = 20%) shaken on the mechanical vibrator showing flow-induced structural color change.

**Video S2** Video of the nanorod CCA (volume fraction = 20%) flowing through the pipeline with different flow rates showing flow-induced structural color change.

**Video S3** Video of the nanorod CCA (volume fraction = 20%) pressed by the external force showing flow-induced structural color change.
